# Supplementary material
Source: MDPI journal article supplement (https://www.mdpi.com/2076-3417/12/11/5736)
Supplement: s1 [file s1]

# Intelligent Computer-Aided Model for Efficient Diagnosis of Digital Breast Tomosynthesis 3D Imaging Using Deep Learning

Alaa M. Adel El-Shazli <sup>1, \*</sup>, Sherin M. Youssef <sup>2</sup> and Abdel Hamid Soliman <sup>3</sup>

<sup>1</sup> Computer Engineering Department, Arab Academy for Science, Technology and Maritime Transport (AASTMT), Giza 12577, Egypt; alaa.alshazli@aast.edu (A.E.-S.)

<sup>2</sup> Computer Engineering Department, Arab Academy for Science, Technology and Maritime Transport (AASTMT), Alexandria 1029, Egypt; sherin@aast.edu (S.M.Y.)

<sup>3</sup> School of Digital, Technologies and Arts, Staffordshire University, Stoke-on-Trent ST4 2DE, UK; A.Soliman@staffs.ac.uk (A.A.)

\* Correspondence: alaa.alshazli@aast.edu; Tel.: +201287278224

**Table S1.** ResNet-18's architectural details [16]

| Layer Name      | Output Size                | ResNet-18                                                                                                             |
|-----------------|----------------------------|-----------------------------------------------------------------------------------------------------------------------|
| conv1           | $112 \times 112 \times 64$ | $7 \times 7, 64, \text{stride } 2$                                                                                    |
| conv2_x         | $56 \times 56 \times 64$   | $3 \times 3 \text{ max pool, stride } 2$<br>$\begin{bmatrix} 3 \times 3, 64 \\ 3 \times 3, 64 \end{bmatrix} \times 2$ |
| conv3_x         | $28 \times 28 \times 128$  | $\begin{bmatrix} 3 \times 3, 128 \\ 3 \times 3, 128 \end{bmatrix} \times 2$                                           |
| conv4_x         | $14 \times 14 \times 256$  | $\begin{bmatrix} 3 \times 3, 256 \\ 3 \times 3, 256 \end{bmatrix} \times 2$                                           |
| conv5_x         | $7 \times 7 \times 512$    | $\begin{bmatrix} 3 \times 3, 512 \\ 3 \times 3, 512 \end{bmatrix} \times 2$                                           |
| average pool    | $1 \times 1 \times 512$    | $7 \times 7 \text{ average pool}$                                                                                     |
| fully connected | 1000                       | $512 \times 1000 \text{ fully connections}$                                                                           |
| softmax         | 1000                       |                                                                                                                       |

**Table S2.** AlexNet's architectural details [20]

| Layer  | Feature Map | Size | Kernel Size   | Stride | Activation |
|--------|-------------|------|---------------|--------|------------|
| Input  | Image       | 1    | 227x227x3     | -      | -          |
| 1      | Convolution | 96   | 55 x 55 x 96  | 11x11  | 4          |
|        | Max Pooling | 96   | 27 x 27 x 96  | 3x3    | 2          |
| 2      | Convolution | 256  | 27 x 27 x 256 | 5x5    | 1          |
|        | Max Pooling | 256  | 13 x 13 x 256 | 3x3    | 2          |
| 3      | Convolution | 384  | 13 x 13 x 384 | 3x3    | 1          |
| 4      | Convolution | 384  | 13 x 13 x 384 | 3x3    | 1          |
| 5      | Convolution | 256  | 13 x 13 x 256 | 3x3    | 1          |
|        | Max Pooling | 256  | 6 x 6 x 256   | 3x3    | 2          |
| 6      | FC          | -    | 9216          | -      | -          |
| 7      | FC          | -    | 4096          | -      | -          |
| 8      | FC          | -    | 4096          | -      | -          |
| Output | FC          | -    | 1000          | -      | -          |

**Table S3.** GoogleNet layers [22]

| type           | patch size/<br>stride | output<br>size | depth | #1×1 | #3×3<br>reduce | #3×3 | #5×5<br>reduce | #5×5 | pool<br>proj | params | ops  |
|----------------|-----------------------|----------------|-------|------|----------------|------|----------------|------|--------------|--------|------|
| convolution    | 7×7/2                 | 112×112×64     | 1     |      |                |      |                |      |              | 2.7K   | 34M  |
| max pool       | 3×3/2                 | 56×56×64       | 0     |      |                |      |                |      |              |        |      |
| convolution    | 3×3/1                 | 56×56×192      | 2     |      | 64             | 192  |                |      |              | 112K   | 360M |
| max pool       | 3×3/2                 | 28×28×192      | 0     |      |                |      |                |      |              |        |      |
| inception (3a) |                       | 28×28×256      | 2     | 64   | 96             | 128  | 16             | 32   | 32           | 159K   | 128M |
| inception (3b) |                       | 28×28×480      | 2     | 128  | 128            | 192  | 32             | 96   | 64           | 380K   | 304M |
| max pool       | 3×3/2                 | 14×14×480      | 0     |      |                |      |                |      |              |        |      |
| inception (4a) |                       | 14×14×512      | 2     | 192  | 96             | 208  | 16             | 48   | 64           | 364K   | 73M  |
| inception (4b) |                       | 14×14×512      | 2     | 160  | 112            | 224  | 24             | 64   | 64           | 437K   | 88M  |
| inception (4c) |                       | 14×14×512      | 2     | 128  | 128            | 256  | 24             | 64   | 64           | 463K   | 100M |
| inception (4d) |                       | 14×14×528      | 2     | 112  | 144            | 288  | 32             | 64   | 64           | 580K   | 119M |
| inception (4e) |                       | 14×14×832      | 2     | 256  | 160            | 320  | 32             | 128  | 128          | 840K   | 170M |
| max pool       | 3×3/2                 | 7×7×832        | 0     |      |                |      |                |      |              |        |      |
| inception (5a) |                       | 7×7×832        | 2     | 256  | 160            | 320  | 32             | 128  | 128          | 1072K  | 54M  |
| inception (5b) |                       | 7×7×1024       | 2     | 384  | 192            | 384  | 48             | 128  | 128          | 1388K  | 71M  |
| avg pool       | 7×7/1                 | 1×1×1024       | 0     |      |                |      |                |      |              |        |      |
| dropout (40%)  |                       | 1×1×1024       | 0     |      |                |      |                |      |              |        |      |
| linear         |                       | 1×1×1000       | 1     |      |                |      |                |      |              | 1000K  | 1M   |
| softmax        |                       | 1×1×1000       | 0     |      |                |      |                |      |              |        |      |

**Table S4.** MobileNetV2 layers [26]

| Input                    | Operator    |
|--------------------------|-------------|
| $224^2 \times 3$         | conv2d      |
| $112^2 \times 32$        | bottleneck  |
| $112^2 \times 16$        | bottleneck  |
| $56^2 \times 24$         | bottleneck  |
| $28^2 \times 32$         | bottleneck  |
| $14^2 \times 64$         | bottleneck  |
| $14^2 \times 96$         | bottleneck  |
| $7^2 \times 160$         | bottleneck  |
| $7^2 \times 320$         | conv2d 1x1  |
| $7^2 \times 1280$        | avgpool 7x7 |
| $1 \times 1 \times 1280$ | conv2d 1x1  |

**Table S5.** Comparison between the six DL models on Dataset 1 after pre-processing in terms of Accuracy with a 95% Confidence Interval (CI) and Run-time in seconds

| Deep Learning Model | Accuracy<br>(± 95% CI) | Run-time (sec) |
|---------------------|------------------------|----------------|
| <b>ResNet-18</b>    | 48.65% (±6.93%)        | 649            |
| <b>AlexNet</b>      | 56.86% (±6.86%)        | 652            |
| <b>GoogleNet</b>    | 47.60% (±6.92%)        | 1,141          |
| <b>VGG 16</b>       | 50.67% (±6.93%)        | 4,759          |
| <b>MobileNetV2</b>  | 51.53% (±6.93%)        | 780            |
| <b>DenseNet-201</b> | 46.11% (±6.91%)        | 4,479          |

**Table S6.** Comparison between the six DL models on Dataset 2 in terms of Accuracy with a 95% Confidence Interval (CI) and Run-time in seconds

| Deep Learning Model | Accuracy<br>(± 95% CI) | Run-time (sec) |
|---------------------|------------------------|----------------|
| <b>ResNet-18</b>    | 67.43% (±5.30%)        | 1,535          |
| <b>AlexNet</b>      | 77.80% (±4.70%)        | 1,040          |
| <b>GoogleNet</b>    | 63.08% (±5.46%)        | 1,986          |
| <b>VGG-16</b>       | 68.89% (±5.24%)        | 9,174          |
| <b>MobileNetV2</b>  | 68.42% (±5.26%)        | 1,663          |
| <b>DenseNet-201</b> | 65.40% (±5.38%)        | 9,259          |

**Table S7.** Comparison between the six DL models on Dataset 1 and Dataset 2 in terms of Accuracy with a 95% Confidence Interval (CI) and Run-time in seconds

| Deep Learning Model | Dataset 1                    |                | Dataset 2                    |                |
|---------------------|------------------------------|----------------|------------------------------|----------------|
|                     | Accuracy<br>( $\pm 95\%$ CI) | Run-time (sec) | Accuracy<br>( $\pm 95\%$ CI) | Run-time (sec) |
| ResNet-18           | 48.65% ( $\pm 6.93\%$ )      | 649            | 67.43% ( $\pm 5.30\%$ )      | 1,535          |
| AlexNet             | 56.86% ( $\pm 6.86\%$ )      | 652            | 77.80% ( $\pm 4.70\%$ )      | 1,040          |
| GoogleNet           | 47.60% ( $\pm 6.92\%$ )      | 1,141          | 63.08% ( $\pm 5.46\%$ )      | 1,986          |
| VGG-16              | 50.67% ( $\pm 6.93\%$ )      | 4,759          | 68.89% ( $\pm 5.24\%$ )      | 9,174          |
| MobileNetV2         | 51.53% ( $\pm 6.93\%$ )      | 780            | 68.42% ( $\pm 5.26\%$ )      | 1,663          |
| DenseNet-201        | 46.11% ( $\pm 6.91\%$ )      | 4,479          | 65.40% ( $\pm 5.38\%$ )      | 9,259          |

**Table S8.** Comparison between the six DL models on Dataset 2 and Dataset 3 in terms of Accuracy with a 95% Confidence Interval (CI) and Run-time in seconds

| Deep Learning Model | Dataset 2                    |                | Dataset 3                    |                |
|---------------------|------------------------------|----------------|------------------------------|----------------|
|                     | Accuracy<br>( $\pm 95\%$ CI) | Run-time (sec) | Accuracy<br>( $\pm 95\%$ CI) | Run-time (sec) |
| ResNet-18           | 67.43% ( $\pm 5.30\%$ )      | 1,535          | 87.91% ( $\pm 2.61\%$ )      | 7,614          |
| AlexNet             | 77.80% ( $\pm 4.70\%$ )      | 1,040          | 89.60% ( $\pm 2.44\%$ )      | 2,562          |
| GoogleNet           | 63.08% ( $\pm 5.46\%$ )      | 1,986          | 83.47% ( $\pm 2.97\%$ )      | 14,874         |
| VGG-16              | 68.89% ( $\pm 5.24\%$ )      | 9,174          | 88.00% ( $\pm 2.60\%$ )      | 22,381         |
| MobileNetV2         | 68.42% ( $\pm 5.26\%$ )      | 1,663          | 84.47% ( $\pm 2.90\%$ )      | 10,120         |
| DenseNet-201        | 65.40% ( $\pm 5.38\%$ )      | 9,259          | 84.81% ( $\pm 2.87\%$ )      | 37,011         |

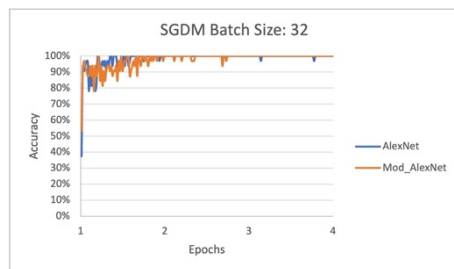

(a)

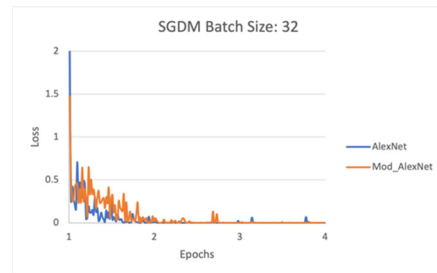

(b)

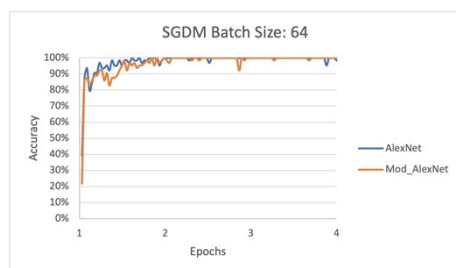

(c)

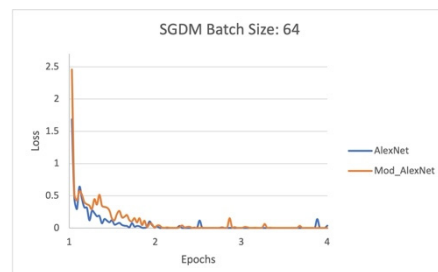

(d)

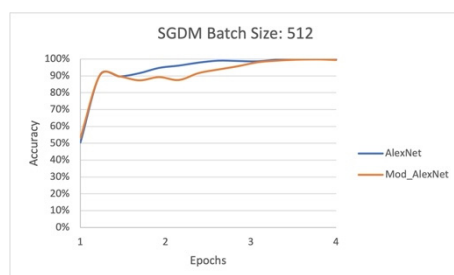

(e)

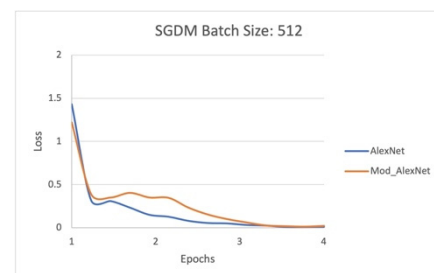

(f)

**Figure S1.** For SGDM optimizer (a) Training Accuracy on Batch size: 32, (b) Training Loss on Batch size: 32, (c) Training Accuracy on Batch size: 64, (d) Training Loss on Batch size: 64, (e) Training Accuracy on Batch size: 512, (f) Training Loss on Batch size: 512.

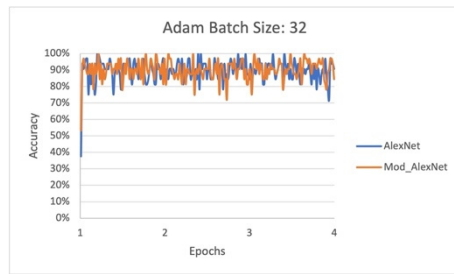

(a)

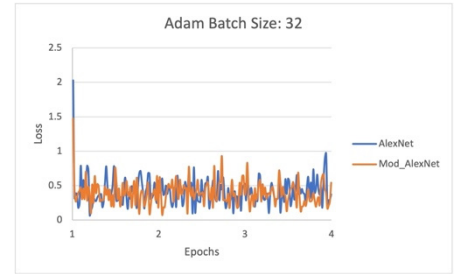

(b)

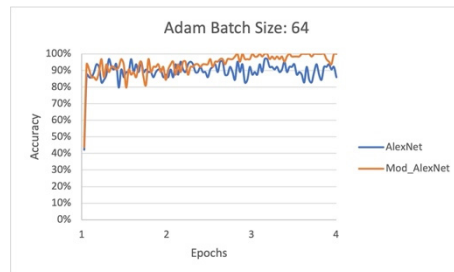

(c)

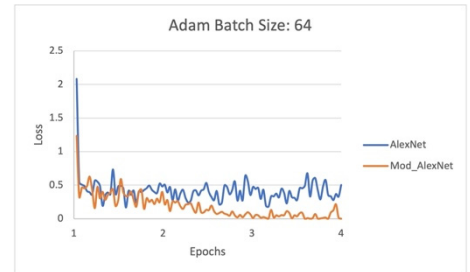

(d)

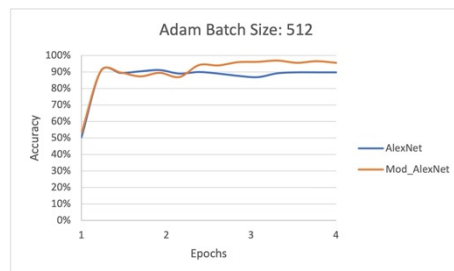

(e)

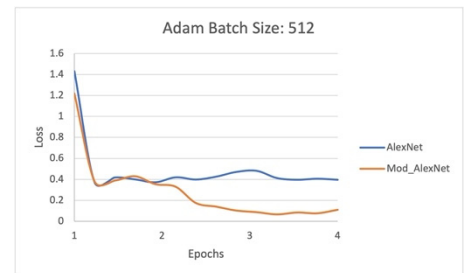

(f)

**Figure S2.** For Adam Optimizer (a) Training Accuracy on Batch size: 32, (b) Training Loss on Batch size: 32, (c) Training Accuracy on Batch size: 64, (d) Training Loss on Batch size: 64, (e) Training Accuracy on Batch size: 512, (f) Training Loss on Batch size: 512.

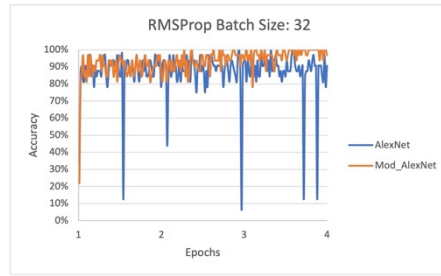

(a)

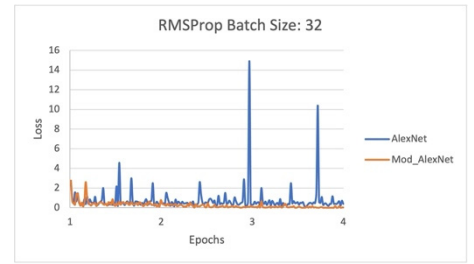

(b)

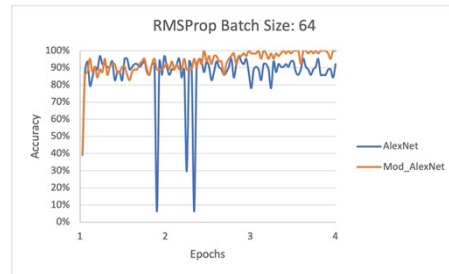

(c)

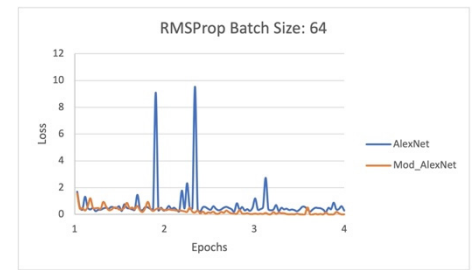

(d)

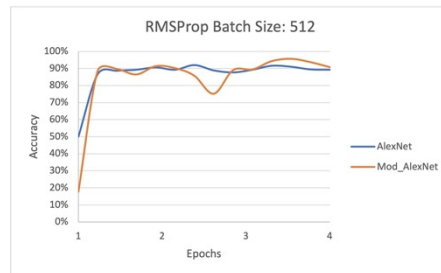

(e)

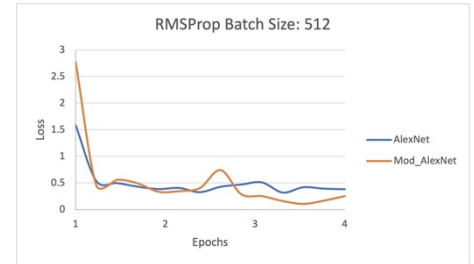

(f)

**Figure S3.** For RMSProp (a) Training Accuracy on Batch size: 32, (b) Training Loss on Batch size: 32, (c) Training Accuracy on Batch size: 64, (d) Training Loss on Batch size: 64, (e) Training Accuracy on Batch size: 512, (f) Training Loss on Batch size: 512.
